# Supplementary material
Source: MDPI journal article supplement (https://www.mdpi.com/2227-7390/9/16/1871)
Supplement: s1 [file s1]

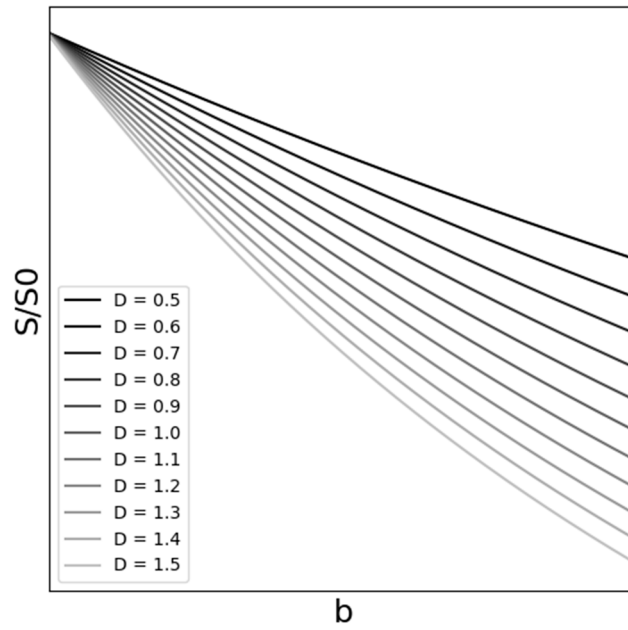

Figure S1: Signal attenuation due to the astrosticks model as a function of b-value for several diffusivities. Increasing diffusivity acts to increase attenuation across the entire b-value range and increase the curvature of the attenuation curve.

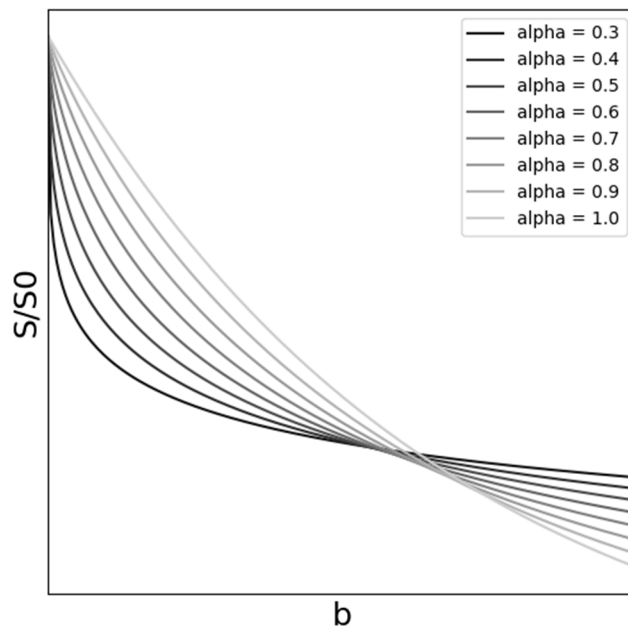

Figure S2: Signal attenuation from the Fractional diffusion model of diffusion MRI signal decay as a function of b-value over a range of exponent values in the quasi-diffusion approximation. Decreasing  $\alpha$  has the effect of increasing the rate of attenuation at low  $b$  but reducing it at high  $b$ .

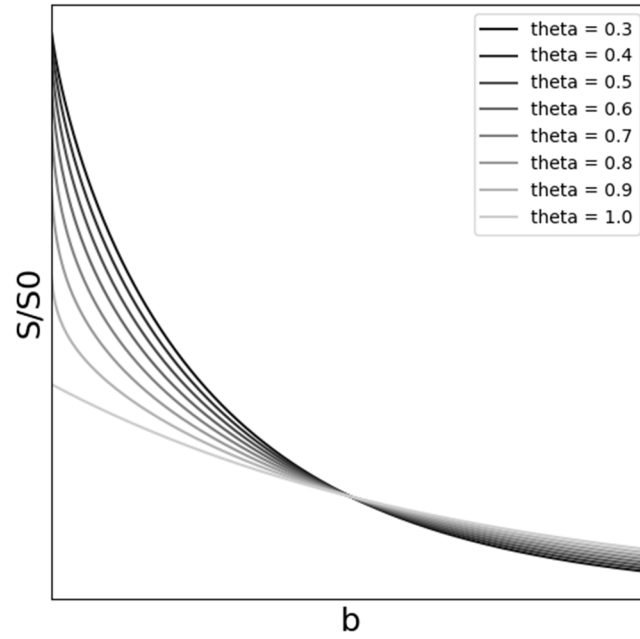

Figure S3: Signal attenuation from the RPBM / time dependent diffusivity model assuming instantaneous monoexponential decay. Similarly to the fractional model, changes in the exponent  $\theta$  cause the signal to decay more rapidly at low  $b$ -value and less rapidly at high  $b$ -value, but here the direction of change is the reverse: decreasing  $\theta$  rather than increasing  $\alpha$ .
